# Supplementary material
Source: PubMed Central journal article supplement (PMC4270899)
Supplement: NIHMS616414-supplement-000398_-_Supplemental_Material.pdf [file NIHMS616414-supplement-000398_-_Supplemental_Material.pdf]

## SUPPLEMENTAL MATERIAL

Supplemental Figure 1

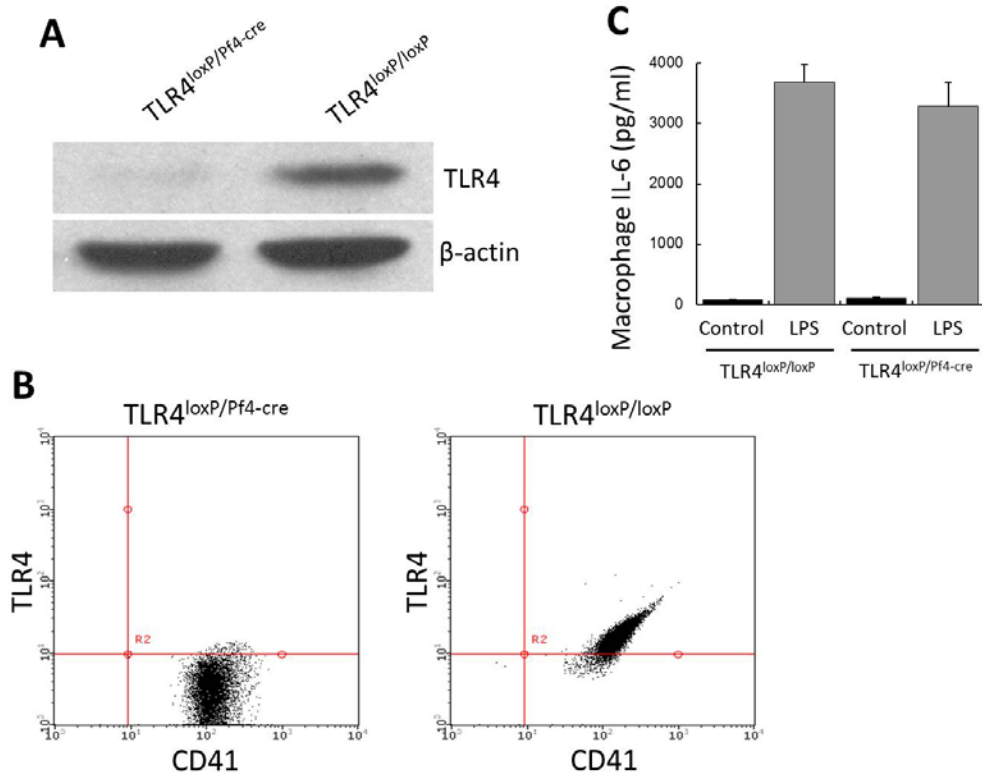

**Supplemental Figure 1. Specific deletion of TLR4 in platelets.** A: Platelets from TLR4<sup>loxP/loxP</sup> and TLR4<sup>loxP/Pf4-cre</sup> mice were isolated and lysates analyzed by western blotting for TLR4. B: Platelet rich plasma from TLR4<sup>loxP/loxP</sup> and TLR4<sup>loxP/Pf4-cre</sup> mice was isolated and stained for TLR4 and CD41. Representative dual parameter dot-plot figures obtained by flow cytometry are shown. C: LPS treatment of peritoneal macrophages isolated from TLR4<sup>loxP/loxP</sup> and TLR4<sup>loxP/Pf4-cre</sup> reveals intact TLR4 signaling with no significant differences in HS-R values between groups as measured by IL-6 concentration by ELISA. N=7 mice/group.
